# Supplementary material
Source: MDPI journal article supplement (https://www.mdpi.com/2073-4433/14/7/1054)
Supplement: s1 [file s1]

Supplementary Materials

# Assessment of Carbonaceous Aerosol Properties across an Urban Environment during the Cold Season

Julija Pauraite, Vadimas Dudoitis and Steigvilė Byčenkienė

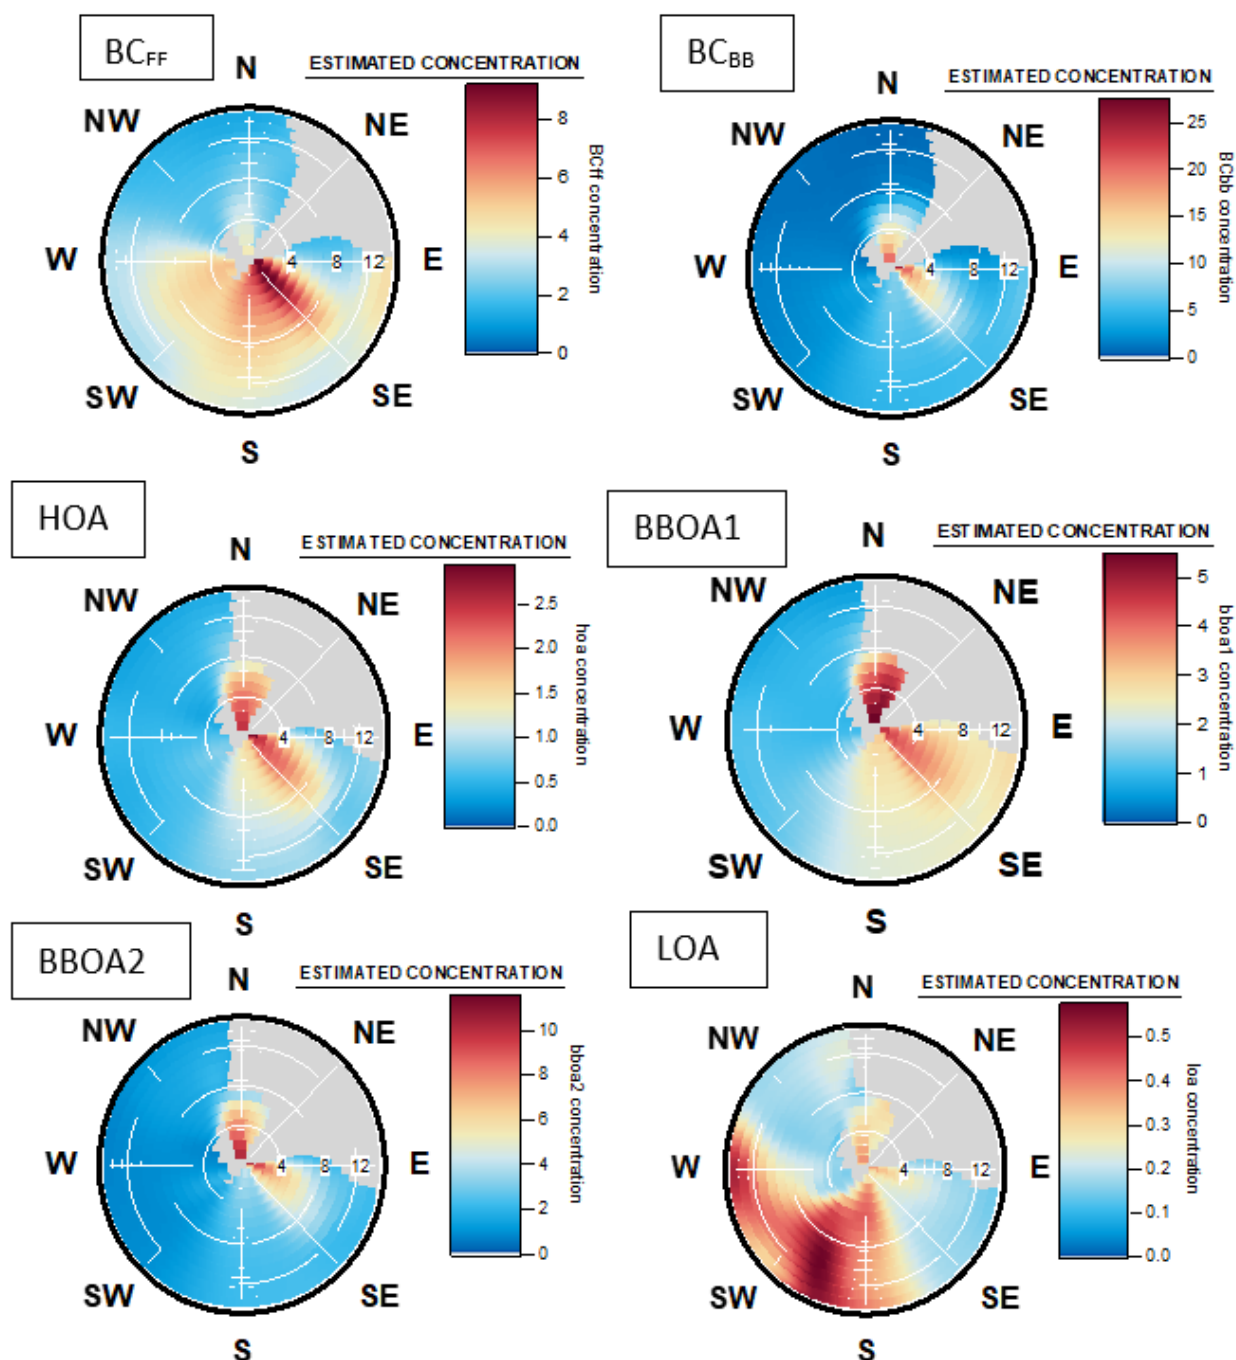

Figure S1. Pollution roses.
